# Supplementary material for: Self-administered transcranial direct current stimulation treatment of knee osteoarthritis alters pain-related fNIRS connectivity networks
Source: PubMed Central journal article supplement (PMC10063907; doi:10.1117/1.nph.10.1.015011), 2023-03-31
Supplement: NPh_010_015011_SD001.pdf [file NPh_010_015011_SD001.pdf]

# Self-administered tDCS Treatment of Knee Osteoarthritis Alters Pain-related fNIRS Connectivity Networks

Samuel Montero-Hernandez<sup>a</sup>, Luca Pollonini<sup>a,b,c</sup>, Lindsey Park<sup>d</sup>, Geraldine Martorella<sup>d</sup>, Hongyu Miao<sup>d</sup>, Kenneth B. Mathis<sup>e</sup> and Hyochol Ahn<sup>d</sup>

<sup>a</sup> Department of Engineering Technology, University of Houston, 4800 MLK Blvd., Houston, TX 77204 USA

<sup>b</sup> Department of Electrical and Computer Engineering, University of Houston, 4800 MLK Blvd., Houston, TX 77204 USA

<sup>c</sup> Department of Biomedical Engineering, University of Houston, 4800 MLK Blvd., Houston, TX 77204 USA

<sup>d</sup> College of Nursing, Florida State University, 98 Varsity Way, Tallahassee, FL 32306 USA

<sup>e</sup> Department of Orthopedic Surgery McGovern Medical School at The University of Texas Health Science Center at Houston 6431 Fannin Houston, TX 77030

## Supplemental Figures

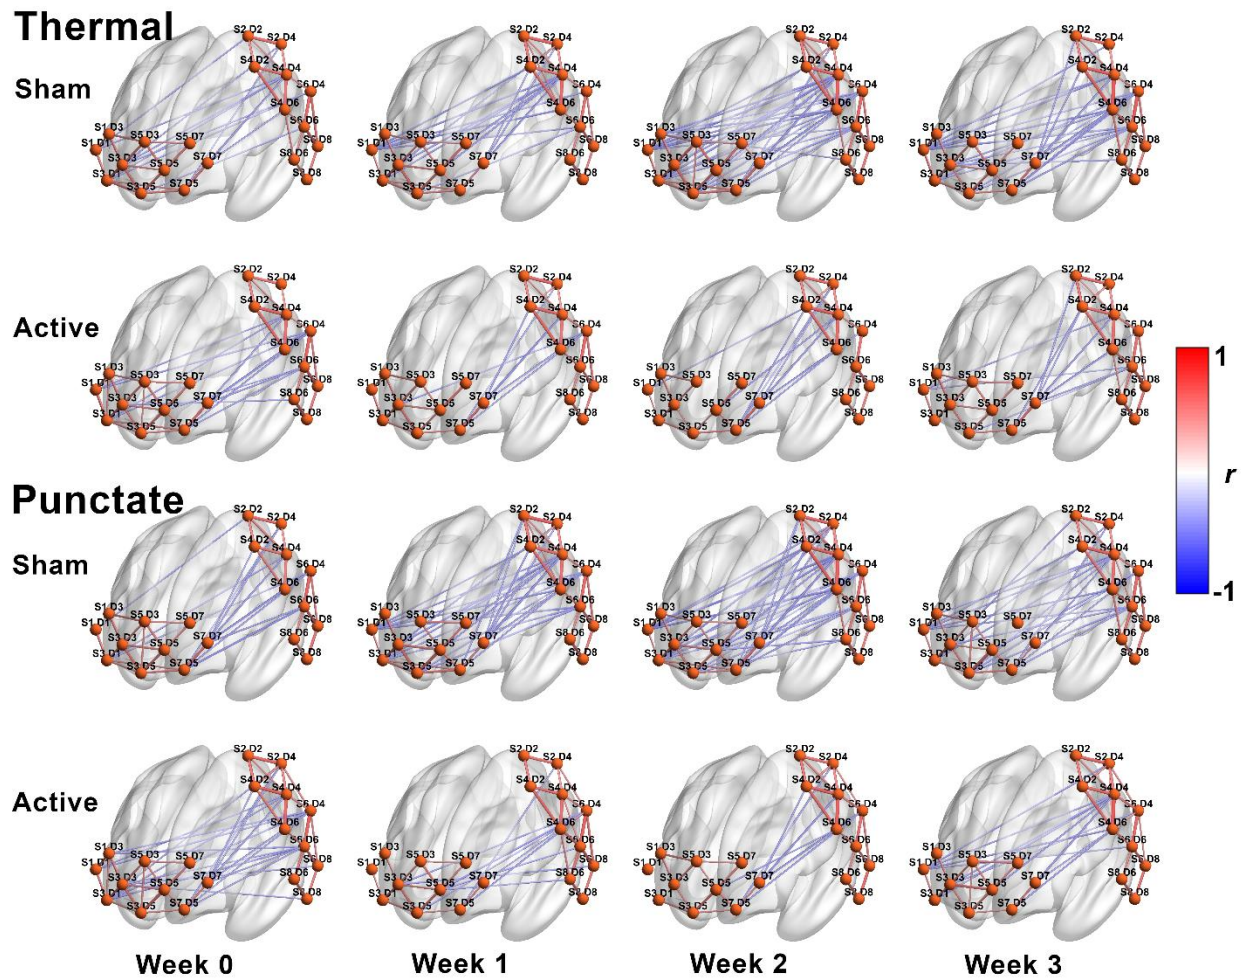

**Figure S1** Group-level connectivity maps across weeks (columns) for thermal-sham, thermal-active, punctate-sham, and punctate-active groups (rows). Positive and negative correlation values are encoded in the color and size of the network links.

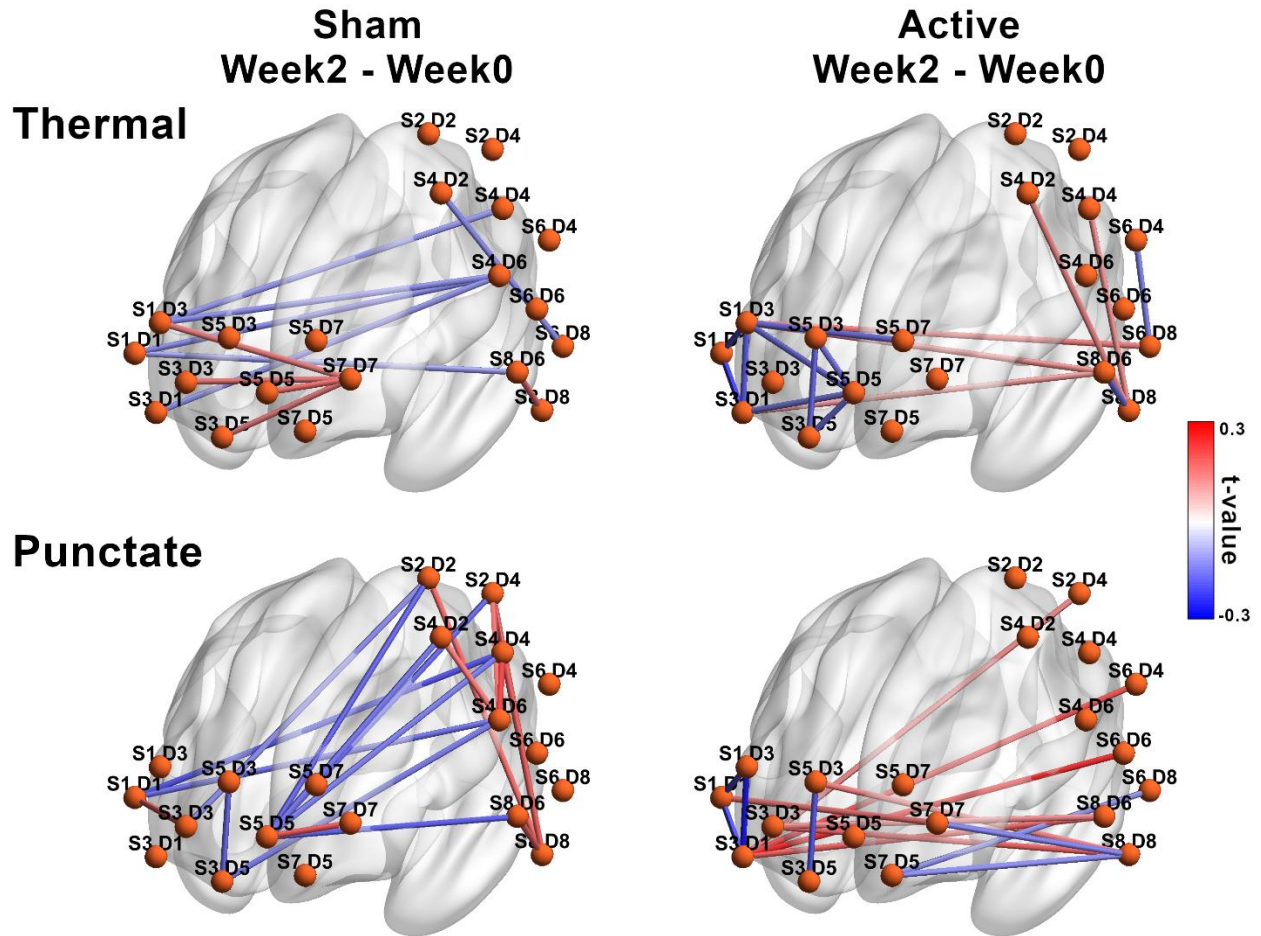

**Figure S2** Group-level connectivity maps contrast Week 2 -Week 0 for thermal and punctate stimuli (rows) and sham and active groups (columns). Positive and negative t values are color encoded in the network links.

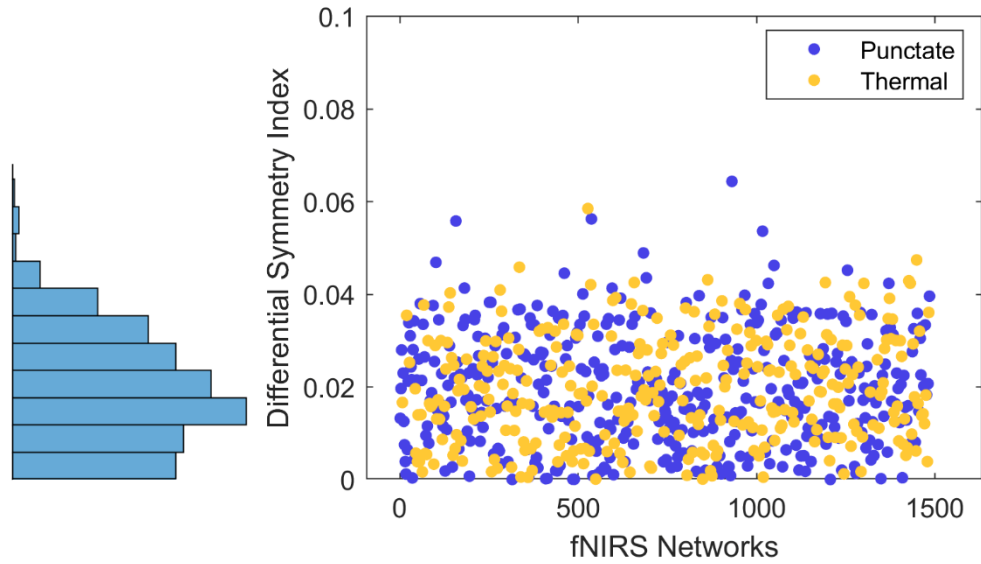

**Figure S3** Symmetry between connectivity networks. Differential symmetry index (DSI) quantified the shared information between 743 pairs of HbO<sub>2</sub>-HbR connectivity networks (circles). The histogram of the symmetry values is indicated on the left.

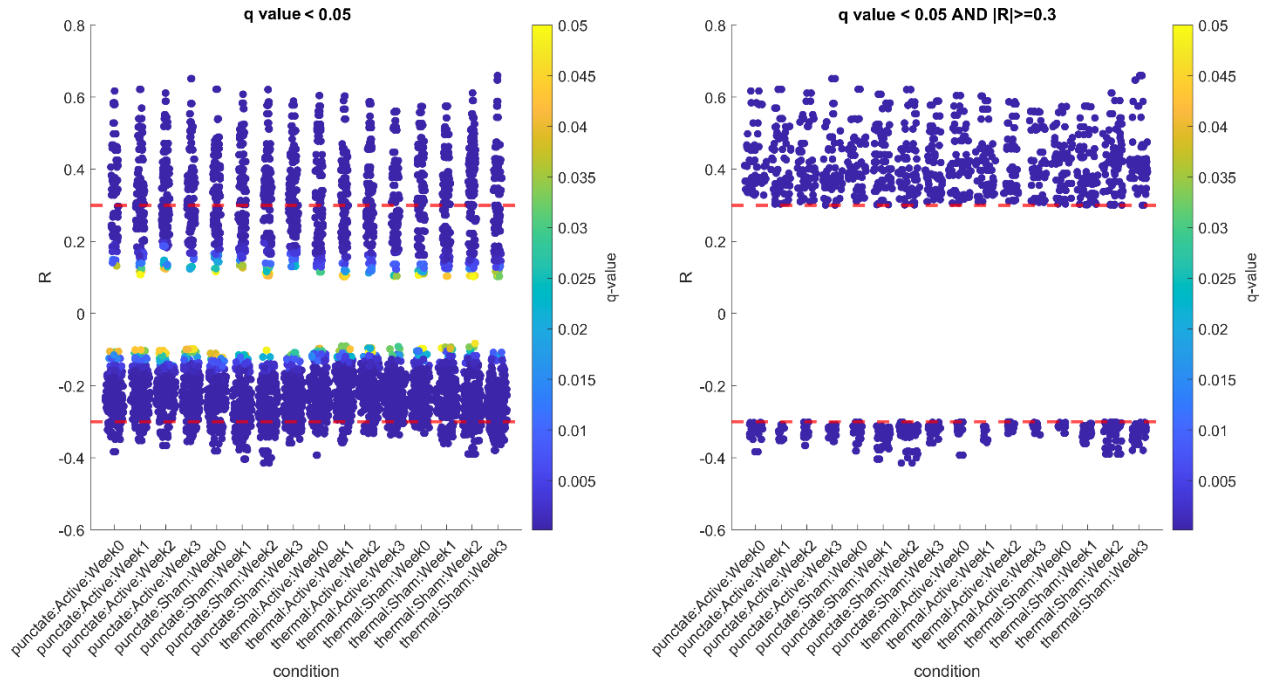

**Figure S4** R-values and statistical significance thresholding of functional connectivity networks. R-values (Y-axis) are shown for every functional connection arranged by stimuli, group, and weeks. R-values before (left) and after (right) applying the  $|R| \geq 0.3$  thresholding. Statistical significance (q-values) of R values is color encoded.

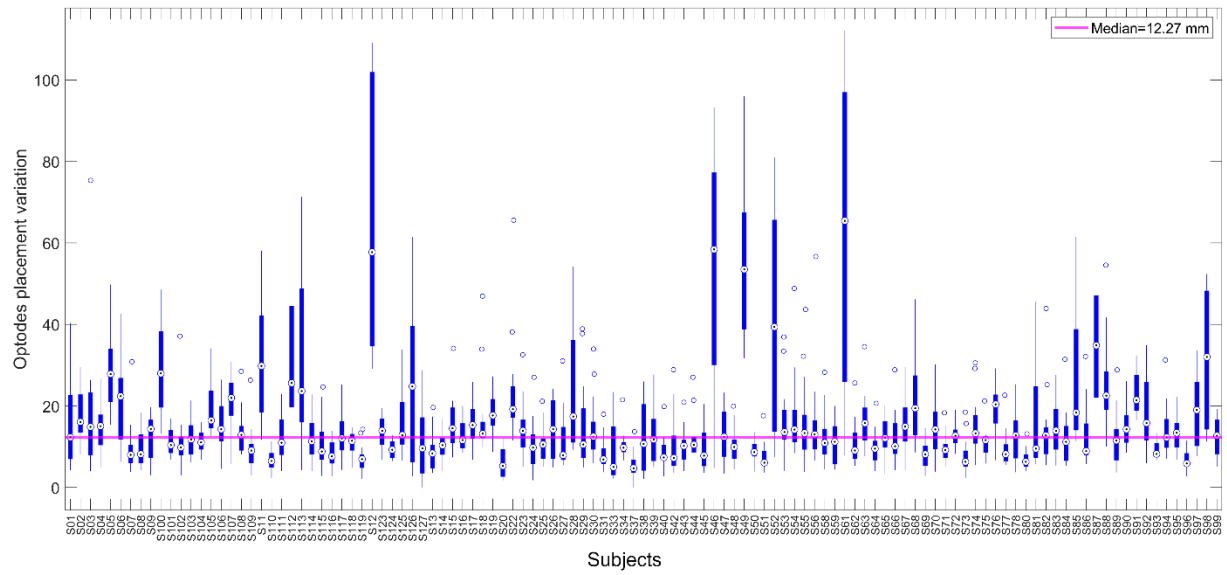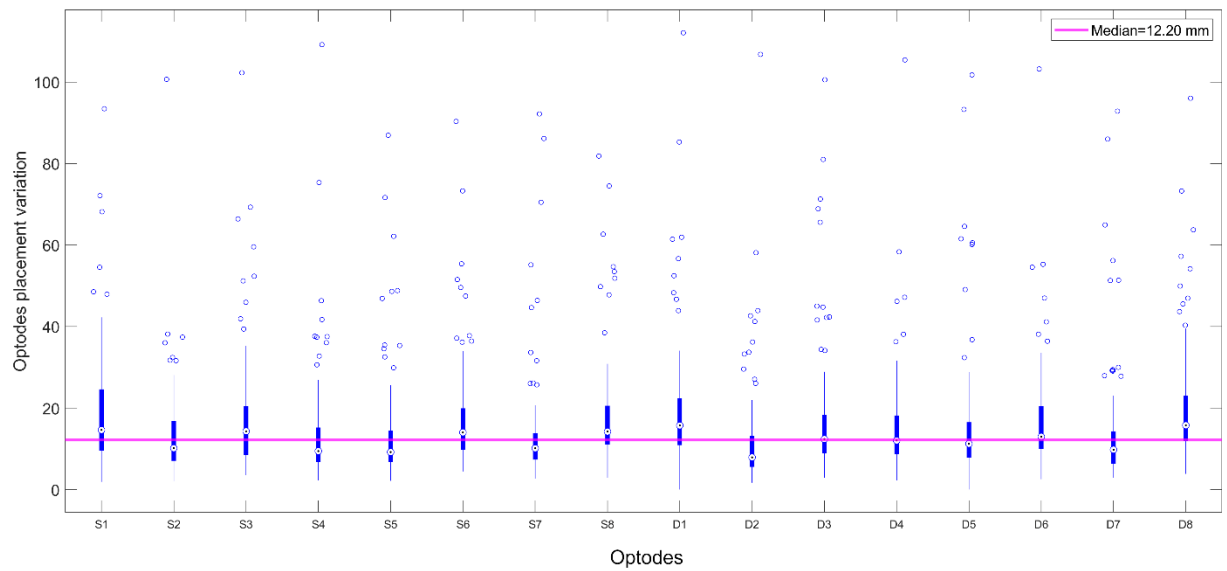

**Figure S5** Probe placement variation at the subject level across sessions (top) and at the optode level across optodes (bottom). The outliers and boxes illustrate unsuccessful digitizations with greater IQR.
